# Supplementary material for: A simian-adenovirus-vectored rabies vaccine suitable for thermostabilisation and clinical development for low-cost single-dose pre-exposure prophylaxis
Source: PubMed Central journal article supplement (PMC6224154; doi:10.1371/journal.pntd.0006870), 2018-10-29
Supplement: pntd.0006870.s001.pdf [file pntd.0006870.s001.pdf]

# Supplementary Figure 1

A

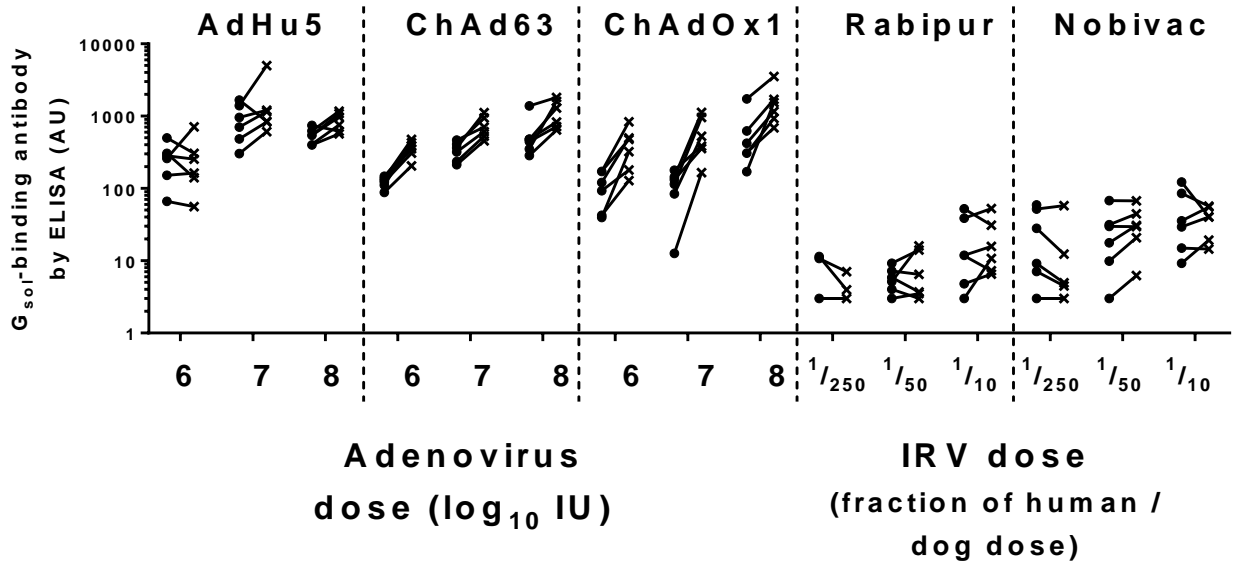

B

| Vaccine               | Parameter |         |             |
|-----------------------|-----------|---------|-------------|
|                       | Time      | Dose    | Interaction |
| <b>AdHu5 RabG</b>     | 0.057     | 0.0008  | 0.204       |
| <b>ChAd63 RabG</b>    | <0.0001   | <0.0001 | 0.212       |
| <b>ChAdOx1 RabG</b>   | <0.0001   | 0.003   | 0.238       |
| <b>Rabipur</b>        | 0.819     | 0.019   | 0.358       |
| <b>Nobivac Rabies</b> | 0.947     | 0.148   | 0.074       |
